# Supplementary material for: Properties of immature and mature dendritic cells: phenotype, morphology, phagocytosis, and migration
Source: Royal Society of Chemistry journal article supplement (doi:10.1039/c9ra00818g), 2019-01-01
Supplement: c9ra00818g1.pdf [file c9ra00818g1.pdf]

## Supporting Information

*for*

### **Properties of Immature and Mature Dendritic cells: Phenotype, Morphology, Phagocytosis, and Migration**

*Min Kyung Kim<sup>†</sup> and Jaeyun Kim<sup>†, ‡, §,\*</sup>*

<sup>†</sup>Department of Health Sciences and Technology, Samsung Advanced Institute for Health Science & Technology (SAIHST), Sungkyunkwan University (SKKU), Suwon 16419, Republic of Korea

<sup>‡</sup>School of Chemical Engineering, Sungkyunkwan University (SKKU), Suwon 16419, Republic of Korea

<sup>§</sup>Biomedical Institute for Convergence at SKKU (BICS), Sungkyunkwan University (SKKU), Suwon 16419, Republic of Korea

\* To whom correspondence should be addressed: Jaeyun Kim, [kimjaeyun@skku.edu](mailto:kimjaeyun@skku.edu)

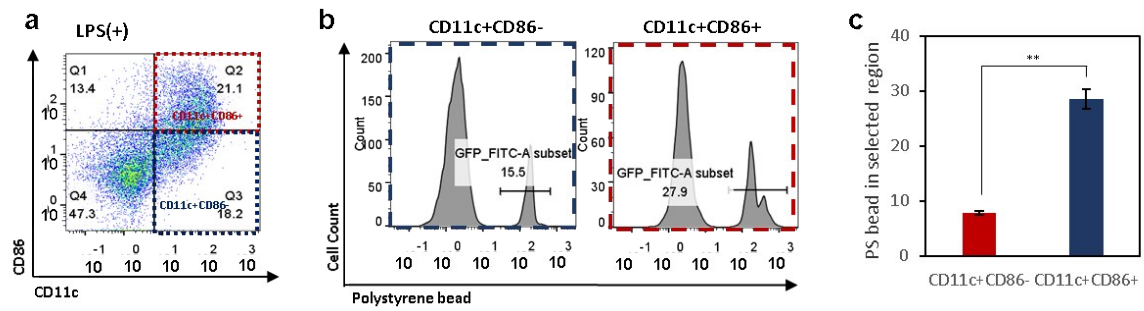

**Figure S1.** (a) Flow cytometry plot of LPS-treated BMDCs, used to analyze cellular uptake levels of PS beads in the CD11c<sup>+</sup>CD86<sup>+</sup> and CD11c<sup>+</sup>CD86<sup>-</sup> populations. (b) Flow cytometry histograms of PS beads in the CD11c<sup>+</sup>CD86<sup>+</sup> and CD11c<sup>+</sup>CD86<sup>-</sup> populations. (c) Quantitative analysis of PS bead uptake levels in CD11c<sup>+</sup>CD86<sup>+</sup> and CD11c<sup>+</sup>CD86<sup>-</sup> population. The data are expressed as mean values  $\pm$  SD. \*\*P < 0.01.

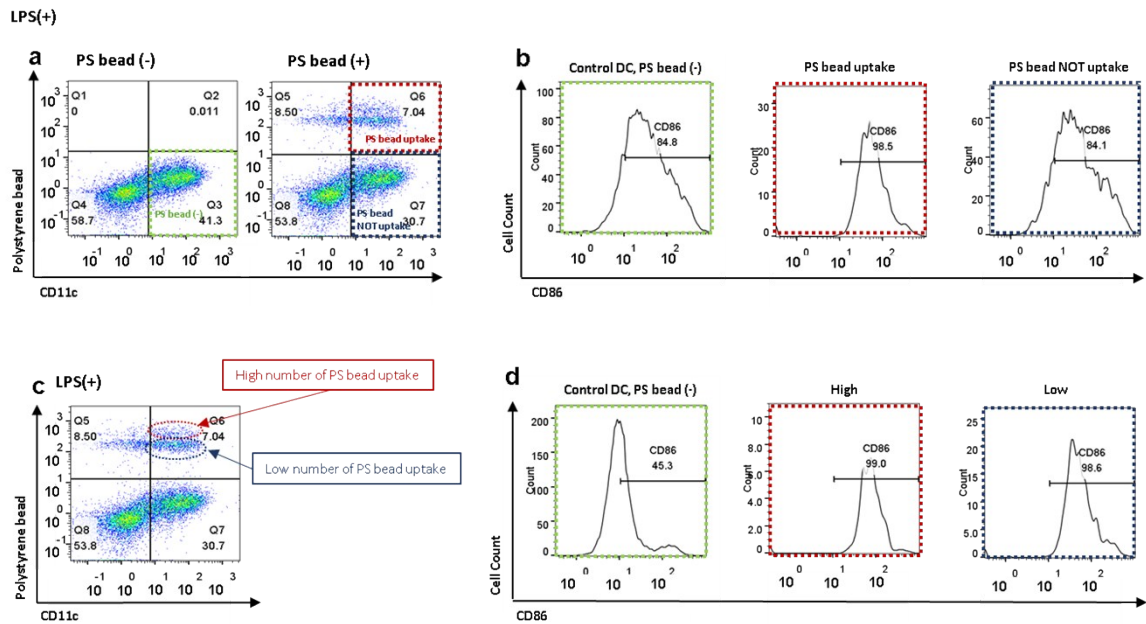

**Figure S2.** (a) Flow cytometry plots of LPS-treated BMDCs and BMDCs after incubation with PS beads, used to analyze the effect of the cellular uptake of PS beads on CD86 levels. Green: LPS-treated BMDCs without incubation with PS beads; Red: LPS-treated BMDCs after incubation with PS beads and with PS bead uptake; Blue: LPS-treated BMDCs after incubation with PS beads, but without PS bead uptake. (b) Flow cytometry histograms showing CD86 levels in LPS-treated BMDCs and BMDCs with and without PS bead internalization. (c) Flow cytometry plot of LPS-treated BMDCs after incubation with PS beads, used to analyze the effect of the number of PS beads that were internalized by CD11c<sup>+</sup> cells on CD86 levels. Red: LPS-treated BMDCs with a high number of PS beads taken up; Green: LPS-treated BMDCs with a low number of PS beads taken up. (d) Flow cytometry histograms showing CD86 levels in LPS-treated BMDCs and BMDCs after incubation with PS beads, with high and low numbers of PS beads taken up.
